# Supplementary material for: Reduction of Fat to Muscle Mass Ratio Is Associated with Improvement of Liver Stiffness in Diabetic Patients with Non-Alcoholic Fatty Liver Disease
Source: MDPI journal article supplement (doi:10.3390/jcm8122175), 2019-12-09
Supplement: s1 [file s1]

**Supplemental Table.** The difference of Characteristic between study participants with or without performing follow-up.

|                                          | No Follow-up    | Follow-up     | <i>p</i> Value |
|------------------------------------------|-----------------|---------------|----------------|
| N                                        | 129             | 117           | -              |
| Men                                      | 81 (62.8)       | 59 (50.4)     | 0.054          |
| Age, year                                | 65.1 (12.4)     | 63.5 (12.2)   | 0.318          |
| Duration of diabetes, years              | 16.6 (18.5)     | 12.0 (9.6)    | 0.029          |
| Body mass index, kg/m <sup>2</sup>       | 25.1 (4.3)      | 25.4 (4.4)    | 0.767          |
| Appendicular skeletal muscle mass, kg    | 20.4 (4.1)      | 19.0 (4.8)    | 0.938          |
| Skeletal muscle index, kg/m <sup>2</sup> | 7.3 (1.2)       | 7.1 (1.2)     | 0.243          |
| Body fat mass, kg                        | 19.8 (8.3)      | 21.2 (8.2)    | 0.157          |
| Body fat percentage, %                   | 29.3 (9.1)      | 31.1 (8.2)    | 0.131          |
| Fat to muscle ratio                      | 0.8 (0.3)       | 0.9 (0.3)     | 0.167          |
| Systolic blood pressure, mmHg            | 132.7 (16.0)    | 134.0 (19.8)  | 0.500          |
| Diastolic blood pressure, mmHg           | 77.9 (9.2)      | 79.1 (11.6)   | 0.782          |
| Platelet count, × 10 <sup>9</sup> /L     | 218.4 (56.5)    | 218.6 (53.9)  | 0.970          |
| Hemoglobin A1c, %                        | 7.4 (1.1)       | 7.5 (1.1)     | 0.593          |
| Hemoglobin A1c, mmol/L                   | 57.7 (12.4)     | 58.4 (12.4)   | 0.593          |
| Aspartate aminotransferase, IU/L         | 26.8 (13.0)     | 29.8 (18.6)   | 0.145          |
| Alanine aminotransferase, IU/L           | 28.3 (19.9)     | 34.9 (30.0)   | 0.040          |
| Gamma-glutamyl transferase, IU/L         | 44.0 (67.0)     | 47.1 (46.4)   | 0.675          |
| Ferritin, ng/mL                          | 144.5 (153.0)   | 126.1 (116.6) | 0.340          |
| Type 4 collagen 7 S, ng/mL               | 5.0 (1.2)       | 4.8 (1.0)     | 0.512          |
| Hyaluronic acid, ng/mL                   | 107.3 (218.8.8) | 85.0 (134.2)  | 0.284          |
| Fib-4 index                              | 1.76 (01.06)    | 1.67 (0.84)   | 0.448          |
| Controlled attenuation parameter, dB/m   | 260.2 (71.3)    | 273.4 (53.5)  | 0.113          |
| Liver stiffness measurement, kPa         | 6.3 (4.2)       | 6.3 (3.4)     | 0.931          |

Continuous variables were presented as the mean (standard deviation; SD) and categorical variables were presented as number (percentage). The paired t test (continuous variable) and Wilcoxon signed-rank test (categorical variable) were performed to identify the statistical differences between baseline and one year after.
